1 **Global gut content data synthesis and phylogeny delineate reef fish trophic**  
2 **guilds**

3  
4  
5 Valeriano Parravicini<sup>1,2†\*</sup>, Jordan M. Casey<sup>1,2†</sup>, Nina M. D. Schiettekatte<sup>1,2</sup>, Simon J. Brandl<sup>1,2,3</sup>,  
6 Chloé Pozas-Schacre<sup>1,2</sup>, Jérémy Carlot<sup>1,2</sup>, Graham J. Edgar<sup>4</sup>, Nicholas A. J. Graham<sup>5</sup>, Mireille  
7 Harmelin-Vivien<sup>6</sup>, Michel Kulbicki<sup>7</sup>, Giovanni Strona<sup>8</sup>, Rick D. Stuart-Smith<sup>4</sup>, and Jason Vii<sup>1,2</sup>

8  
9  
10 <sup>1</sup> PSL Université Paris: EPHE-UPVD-CNRS, USR 3278 CRIOBE, Université de Perpignan, 66860 Perpignan,

11 France

12 <sup>2</sup> Laboratoire d'Excellence "CORAIL," Perpignan, France

13 <sup>3</sup> CESAB, Centre for the Synthesis and Analysis of Biodiversity, Institut Bouisson Bertrand, 34000 Montpellier,  
14 France

15 <sup>4</sup> Institute for Marine and Antarctic Studies, University of Tasmania, Hobart, 7001, Tasmania, Australia

16 <sup>5</sup> Lancaster Environment Centre, Lancaster University, Lancaster, LA1 4YQ, United Kingdom

17 <sup>6</sup> Aix-Marseille Université, Institut Méditerranéen d'Océanologie (MIO), CNRS/INSU, IRD, UM 110, 13288  
18 Marseille, France

19 <sup>7</sup> UMR Entropie, LabEx Corail, IRD, Université de Perpignan, 66000 Perpignan, France

20 <sup>8</sup> University of Helsinki, Department of Bioscience, P.O 65 (Viikinkaari 1), Helsinki, Finland

21

22 † these authors contributed equally

23 \* corresponding author: [valeriano.parravicini@ephe.psl.eu](mailto:valeriano.parravicini@ephe.psl.eu)

24 Author Identification (ORCID)

25 Valeriano Parravicini: 0000-0002-3408-1625

26 Jordan M. Casey: 0000-0002-2434-7207

27 Nina M. D. Schiettekatte: 0000-0002-1925-3484

28 Simon J. Brandl: 0000-0002-6649-2496

29 Jeremy Carlot: 0000-0003-0887-8005

30 Nicholas A. J. Graham: 0000-0002-0304-7467

31 Mireille Harmelin-Vivien: 0000-0003-3085-2899

32 Rick D. Stuart-Smith : 0000-0002-8874-0083

33

## 1 **Abstract**

2 The diversity of life on our planet has produced a remarkable variety of biological traits that  
3 characterize different species. Such traits are widely employed instead of taxonomy to increase  
4 our understanding of biodiversity and ecosystem functioning. However, for species' trophic  
5 niches, one of the most critical aspects of organismal ecology, a paucity of empirical information  
6 has led to inconsistent definitions of trophic guilds based on expert opinion. Using coral reef  
7 fishes as a model, we show that experts often disagree on the assignment of trophic guilds for the  
8 same species. Even when broad categories are assigned, 60% of the evaluated trait schemes  
9 disagree on the attribution of trophic categories for at least 20% of the species. This  
10 disagreement greatly hampers comparability across studies. Here, we introduce a quantitative,  
11 unbiased, and fully reproducible framework to define species' trophic guilds based on empirical  
12 data. First, we synthesize data from community-wide visual gut content analysis of tropical coral  
13 reef fishes, resulting in trophic information from 13,961 individuals belonging to 615 reef fish  
14 species across all ocean basins. We then use network analysis to cluster the resulting global  
15 bipartite food web into distinct trophic guilds, resulting in eight trophic guilds, and employ a  
16 Bayesian phylogenetic model to predict trophic guilds based on phylogeny and maximum body  
17 size. Our model achieved a misclassification error of 5%, indicating that our approach results in  
18 a quantitative and reproducible trophic categorization scheme, which can be updated as new  
19 information becomes available. Although our case study is for reef fishes, the most diverse  
20 vertebrate consumer group, our approach can be applied to other organismal groups to advance  
21 reproducibility in trait-based ecology. As such, our work provides an empirical and conceptual  
22 advancement for trait-based ecology and a viable approach to monitor ecosystem functioning in  
23 our changing world.

## 1 **Introduction**

2 A fundamental goal in ecology is to understand the mechanisms behind the maintenance of  
3 biodiversity and ecosystem functioning [1,2]. Understanding the ecological niches of species is  
4 central to this endeavor [3,4]. In fact, the degree of niche overlap among species can be a major  
5 determinant of the positive relationship among species richness [5], ecosystem productivity [6–  
6 8], and ecosystem vulnerability [9] since limited functional redundancy can make ecosystems  
7 more prone to lose entire energetic pathways [10–12]. With growing threats to biodiversity, the  
8 need to quantify the impact of biodiversity loss has amplified the use of functional groups, which  
9 are species groups that share common ecological characteristics and are often defined with  
10 coarse, categorical descriptors of species traits [13–16].

11 Delineating the ecological niche with discrete categories has several operational  
12 advantages. First, grouping species into categories helps decompose highly complex ecosystems  
13 into comprehensible units, while traditional taxonomic analyses may be difficult to interpret in  
14 highly diverse ecosystems. Second, ecological predictions tied to individual species are restricted  
15 to the geographic range of the species, whereas predictions of functional groups can be globally  
16 comparable. Third, the use of functional groups enables the quantification of functional metrics  
17 (e.g. functional richness and functional redundancy) from a standard community data matrix  
18 without complex experiments [17–19]. The promise of developing “user-friendly” metrics for  
19 functional ecology has motivated the employment of trait-based data in community ecology;  
20 even with a paucity of empirical information, it is often assumed that experts can achieve  
21 accurate descriptions of the ecological niche of species [17,20,21].

22 Coral reefs, one of the most diverse marine ecosystem on Earth, have inspired a plethora  
23 of trait-based ecological studies, with significant recent efforts to compile trait-based datasets for

1 two major components of this ecosystem: corals and fishes [22,23]. For some traits, such as  
2 maximum body size in fishes, the compilation process is simple because unidimensional,  
3 quantitative data (e.g. maximum total length) are compiled in publicly accessible databases;  
4 however, when it comes to species' diet or behavior, obtaining consensual data is much more  
5 difficult. For example, dietary data are multidimensional (i.e. various prey items can be recorded  
6 across individuals), ontogenetically variable (i.e. diet differs between juveniles and adults),  
7 spatially variable (i.e. species may show dietary plasticity across locations), and prone to  
8 methodological differences and observer bias. Therefore, researchers that employ traits to  
9 delineate trophic groups or behavioral characteristics commonly rely on expert opinion [19].  
10 While there is some agreement among experts on which traits are relevant (e.g. diet, mobility,  
11 body size, diel activity), there is often an implicit disagreement on the necessary categories to  
12 describe these traits. For example, across the coral reef literature, the number and resolution of  
13 reef fish trophic guilds substantially differs. Studies commonly define three [24] to eight [25]  
14 trophic guilds, with particular ambivalence on the resolution at which to define herbivores and  
15 invertivores [26–29].

16       Among all trait classification schemes for reef fishes, only a few are openly accessible.  
17 Consequently, different research groups tend to employ proprietary functional classifications,  
18 with little possibility to cross-check and compare assigned traits with previous classifications.  
19 The classification of species into functional groups has advantages for our understanding of  
20 ecological patterns [30,31]. However, the lack of agreement and the limited transparency of trait-  
21 based datasets can conjure skepticism and inhibit the emergence of general patterns.

22       Here, we quantify expert disagreement in the definition of reef fish trophic guilds and  
23 propose a novel, transparent, and quantitative framework to delineate trophic guilds. Using coral

1 reef fishes as a case study, we compiled all quantitative, community-wide dietary analyses from  
2 several locations across the Pacific and Caribbean and used network analysis to define eight  
3 modules that correspond to trophic guilds. We then examined phylogenetic niche conservatism  
4 with a phylogenetic Bayesian multinomial model that predicted trophic guilds to the global pool  
5 of coral reef fishes, including measures of uncertainty. Our framework is fully reproducible and  
6 can be extended and updated as new data become available.

7

## 8 **Materials and Methods**

### 9 **Assessment of expert agreement**

10 We systematically searched Google Scholar, including papers since 2000, using the following  
11 keywords: “coral reefs” AND “reef fish” AND (“fish community” OR “fish assemblage”) AND  
12 “diet” AND (“functional group” OR “functional trait” OR “functional entity” OR “trophic guild”  
13 OR “trophic group”). The results were individually assessed to find data on trophic guilds. We  
14 only considered studies performed at the community level that targeted all trophic levels. Most  
15 studies were excluded because they only included specific families or groups, or the data were  
16 not provided with the publication. We often found redundant results, with groups publishing  
17 several papers using the same classification scheme. In those cases, only the first reference was  
18 retained. We contacted authors when trophic classifications were widely used across the  
19 literature, but data were not provided with the publications.

20 Our search yielded a total of eight independent trophic classifications, including Mouillot  
21 et al. [26] and Parravicini et al. [27] with 6,316 species, Brandl et al. [32] with 257 species,  
22 Halpern and Floeter [33] with 1,046 species, Graham et al. [34] with 126 species, Morais and  
23 Bellwood [35] with 515 species, Yeager et al. [36] with 480 species, Newman et al. [37] with 84

1 species, and Stuart-Smith et al. [29] with 3189 species. The classifications were not uniform in  
2 terms of the number and nature of trophic guilds. To achieve comparability, we converted the  
3 original classification to match five broad trophic guilds: *herbivores and detritivores*,  
4 *invertivores, omnivores, planktivores, and piscivores*. All of the classifications could be  
5 reattributed to these categories with the exception of Graham et al. [34], which did not include  
6 the category *omnivores*. In this case, the comparison was made only across the four comparable  
7 guilds.

8         In order to assess expert agreement, we compared each possible pair of classifications  
9 that shared at least 30 species, generated a confusion matrix, and measured agreement as the  
10 proportion of species with matching trophic guild assignments. We then calculated the average  
11 agreement between classification pairs for each trophic guild.

12

### 13 **Data collection on fish gut contents**

14 To provide a quantitative definition of trophic guilds for reef fishes, we collected gut content  
15 data across the literature at the individual or species level for Chondrichthyes (i.e. cartilaginous  
16 fishes) and Osteichthyes (i.e. bony fishes). We obtained dietary information from six published  
17 works: Hiatt & Strasburg (1960) for the Marshall Islands [38], Randall (1967) for Puerto Rico  
18 and the Virgin Islands [39], Hobson (1974) for Hawaii [40], Harmelin-Vivien (1979) for  
19 Madagascar [41], and Sano et al. (1984) for Okinawa [42]. In addition, we provide hitherto  
20 unpublished data on the gut contents of 3,015 individuals collected in New Caledonia from 1984  
21 to 2000.

22         All dietary information was based on visual gut content analysis where prey preference  
23 was quantified as volumetric percentage or item frequency. The data were standardized and

1 analyzed as proportions. To our knowledge, the compiled dataset represents the first compilation  
2 of detailed coral reef food webs across ocean basins. A total of 13,961 non-empty fish guts  
3 belonging to 615 species were analyzed, and more than 1,200 different prey items were  
4 described in the original datasets.

5 First, fish species and family names were taxonomically verified and corrected with the R  
6 package *rfishbase* [43]. Only species with at least ten non-empty guts were kept for further  
7 analysis. The taxonomic classification of each prey item was then obtained, and all poorly  
8 informative (e.g. unidentified fragments, unknown species) and redundant items (e.g. “crustacea  
9 fragments” when co-occurring with an item already identified to lower taxonomic level such as  
10 “shrimp”) were discarded. Prey identification was highly heterogeneous across the six datasets,  
11 differing in taxonomic level and the use of common or scientific names (e.g. crabs *versus*  
12 Brachyura). In order to make the six datasets comparable, prey items were grouped into 38  
13 ecologically informative prey groups (Table S1). Items were generally assigned to groups  
14 corresponding to their phylum or class. Due to the high diversity and detailed descriptions of  
15 crustaceans, they were assigned to the level of order or superorder. Most groups follow official  
16 taxonomic classifications except for “detritus,” “inorganic,” and “zooplankton.” In the West  
17 Indies dataset [39], items labelled as “Algae & Detritus” were assigned to both of the categories  
18 “detritus” and “benthic autotroph,” and the percentage was equally divided in two. The category  
19 “zooplankton” includes all eggs and larvae regardless of taxonomy.

20

## 21 **Definition of trophic guilds**

22 After data cleaning, we compiled dietary information for 615 species. Of those species, 516 were  
23 present in only one location, 66 were collected in two locations, 25 in three locations, 7 in four

1 locations, and only 1 across five locations. Before running an analysis at the species level, we  
2 tested whether there was a strong regional signal for species present across more than one  
3 location. We created a quantitative bipartite network where fish species at each location were  
4 linked to the 38 prey groups. This network was weighted so that edge weights represent the  
5 proportional contribution of each prey group to the diet of a species at a given location.

6 In order to identify network modules that correspond to reef fish trophic guilds and their  
7 preferred prey, we used the maximization of the weighted network modularity based on weighted  
8 bipartite networks [44]. Since the modularity maximization algorithm has an initial random step,  
9 it may converge to different (although similar) suboptimal solutions each time the analysis is  
10 performed, which is common across several optimization algorithms, such as simulated  
11 annealing [45]. To guarantee reproducibility and reduce the risk of basing our analysis on an  
12 outlier, we performed the modularity maximization 500 times and retained the medoid solution,  
13 which was identified as the solution with the highest similarity to the other 499 modules.  
14 Similarity was assessed as the variation of information [46]. Overall, 68% of the site  $\times$  location  
15 combinations for the same species belonged to the same module. Therefore, we considered the  
16 regional effect to be minor and performed the analysis on the global network, ignoring regional  
17 variability and increasing the number of individuals per species.

18

### 19 **Testing for phylogenetic conservatism and predicting trophic guilds**

20 We extracted the phylogenetic position of the 615 species used for the definition of trophic  
21 guilds through the Fish Tree of Life [47]. 603 out of 615 species were available in the Fish Tree  
22 of Life, but only 535 species had verified phylogenetic information. For the taxa available in the  
23 Fish Tree of Life without verified phylogenetic information, we retrieved the pseudo-posterior



1 distribution of 100 synthetic stochastically-resolved phylogenies where missing taxa were placed  
2 according to taxonomy using the function *fishtree\_complete\_phylogeny()* in the R package  
3 *fishtree* [48].

4 We quantified the phylogenetic signal by calculating the phylogenetic statistic  $\delta$ , which  
5 uses a Bayesian approach for discrete variables [49]. The  $\delta$  statistic can be arbitrarily large with a  
6 high level of variation, depending on the number of species and trait levels. To evaluate the  
7 significance of the  $\delta$  statistic, we applied a bootstrapping approach where we quantified  $\delta$  one  
8 hundred times after randomly shuffling the trait values.

9 We then fitted a multinomial phylogenetic regression to predict fish trophic guild  
10 according to phylogeny and body size with the R package *brms* [50]. We used a multinomial  
11 logit link function. As such, the probability of a particular trophic guild is computed as follows:

12  
13 
$$Pr(k | \mu_1, \mu_2, \dots, \mu_k) = \frac{\mu_k}{\sum_1^k \exp(\mu_i)} \quad (1)$$

14 with  $\mu_k$  defined as:

15  
16 
$$\mu_1 = 0, \mu_{k|2:8} = \beta_{0k} + \beta_{1k} \log(\text{sizemax}) + \gamma_{0phy \times k}, \quad (2)$$

17  
18 where  $\beta_{0k}$  is the category-specific fixed-effect intercept,  $\beta_{1k}$  is the slope for the natural  
19 transformed maximum body size for each category  $k$ , and  $\gamma_{0phy \times k}$  is the matrix of random effect  
20 coefficients that account for intercept variation based on relatedness as described by the  
21 phylogeny for each diet category  $k$ . We used uninformative priors and ran the model for three  
22 chains, each with 6,000 iterations and a warm-up of 1,000 iterations. We visualized the fitted  
23 probabilities for each trophic guild with a phylogenetic tree, including the 535 species with  
24 verified phylogenetic positions using the R package *ggtree* [49]. Next, we used our model to  
25 predict the most likely trophic guild for the global pool of reef fish species. For the extrapolation,

1 we selected all species within reef fish families with more than one representative species (but  
2 we also included *Zanclus cornutus*, which is the only species in the family Zanclidae), which  
3 resulted in 50 families. Further, we only selected species with a maximum length greater than 3  
4 cm, which was the maximum size of the smallest fish in our compiled database. This selection  
5 process resulted in a list of 4,554 reef fish species.

6         Currently, no streamlined method exists to predict traits for new species from a  
7 phylogenetic regression model. We circumvented this issue by extracting draws of the  
8 phylogenetic effect ( $\gamma_{0phy \times k}$ ) for each species included in the model. We subsequently predicted  
9 the phylogenetic effects for missing species with the help of the function *phyEstimate* from the R  
10 package *picante* [51]. This function uses phylogenetic ancestral state estimation to infer trait  
11 values for new species on a phylogenetic tree by re-rooting the tree to the parent edge to predict  
12 the node. We repeated this inference across 2,000 draws. Per draw, we randomly sampled one of  
13 the one hundred trees. Then, we predicted the probability of each species to be assigned to each  
14 diet category by combining the predicted phylogenetic effects with the global intercept and  
15 slopes for maximum body size for each draw. Finally, we summarized all diet category  
16 probabilities per species by taking the mean and standard deviation across all 2,000 draws.

17         We quantified the total standard deviation (i.e. the square root of the quadratic sum of the  
18 standard deviations in each category) and the negentropy value, a measure of certainty calculated  
19 by subtracting one from the entropy value (i.e. uncertainty). Thus, the negentropy value lies  
20 between 0 and 1, and the higher the value, the higher the certainty for trophic guild assignment  
21 (i.e. if a given species has a high probability of assignment to a dietary category, the negentropy  
22 value will be high).

23

## 1 **Results**

2

### 3 **Assessment of expert agreement**

4 We evaluated the agreement among eight distinct and independent trophic guild classifications  
5 by comparing the classification schemes in pairs. Considering the broadness of the expert-  
6 assigned categories, we found remarkably low agreement. The median agreement between pairs,  
7 expressed as the proportion of species with matching trophic group assignments, was 77% (Fig.  
8 1). For 50% of the pairwise comparisons, at least a quarter of the species were attributed to  
9 different trophic groups. In the most severe disagreement, the proportion of mismatched  
10 assignments reached 39%. In addition, expert agreement differed depending on the trophic  
11 group. Despite a few peaks of disagreement for *herbivores and detritivores* (~20%), overall,  
12 there was high agreement among experts for this trophic guild, with an average agreement of  
13 94% (Fig. 1b). On the contrary, *omnivores* showed the highest mismatch, with experts  
14 disagreeing on an average of 30% of the species and peaks of disagreement higher than 60%  
15 (Fig. 1b).

16 Expert agreement was variable and often homogeneously distributed around the mean for  
17 all the trophic categories. Therefore, the high agreement between a few combinations of experts  
18 did not necessarily exclude peaks of disagreement (Fig. 1b). The analysis of individual confusion  
19 matrices between pairs of experts revealed high heterogeneity (Fig. 2). For example, Morais and  
20 Bellwood [35] were generally in agreement with Mouillot et al. [26] (across 89% of the 515  
21 species in common), while Mouillot et al. [26] agreed with Stuart-Smith et al. [29] across only  
22 68% of the 2211 species in common.

23 Surprisingly, there was also a high heterogeneity in groups with high disagreement (i.e.  
24 multiple alternative assignments for species not assigned to the same trophic group). Species

1 classified as *invertivores* according to one expert were considered *omnivores*, *piscivores*, or  
2 *planktivores* according to other classification schemes (Fig. 2). Similarly, species considered  
3 *omnivores* by one expert were alternatively considered *invertivores*, *herbivores* and *detritivores*,  
4 or *planktivores* by another expert.

## 6 **Definition of trophic guilds**

7 We defined trophic guilds by identifying modules (i.e. combinations of predators and prey) that  
8 maximize the weighted modularity of the global network. Our analysis robustly identified eight  
9 distinct modules that correspond to different trophic guilds (Fig. 3). We identified these trophic  
10 guilds as:

- 11 (1) *Sessile invertivores*: species predominantly feeding on Asteroidea, Bryozoa, Cirripedia,  
12 Porifera, and Tunicata;
- 13 (2) *Herbivores, microvores, and detritivores (HMD)*: species primarily feeding on  
14 autotrophs, detritus, inorganic material, foraminifera, and phytoplankton;
- 15 (3) *Corallivores*: species primarily feeding on Anthozoa and Hydrozoa;
- 16 (4) *Piscivores*: species primarily feeding on Actinopterygii and Cephalopoda;
- 17 (5) *Microinvertivores*: species primarily feeding on Annelida, Arachnida, Hemichordata,  
18 Nematoda, Peracarida, and Nemertea;
- 19 (6) *Macroinvertivores*: species primarily feeding on Mollusca and Echinodermata;
- 20 (7) *Crustacivores*: species primarily feeding on Decapoda and Stomatopoda;
- 21 (8) *Planktivores*: species mainly feeding on zooplankton and Harpacticoida.

22

## 1 **Phylogenetic signal**

2 To evaluate the significance of the phylogenetic statistic value ( $\delta = 9.37$ ), we applied a  
3 bootstrapping approach and quantified  $\delta$  after randomly shuffling the trait values 100 times. The  
4 median  $\delta$  of these null models was 0.000199 (95% confidence interval [0.000196, 0.000204]),  
5 indicating a strong phylogenetic signal associated with the eight trophic guilds.

6 Phylogeny and maximum body size were sufficient to correctly predict the trophic guild of  
7 97% of the species in our dataset. For most families, there was strong phylogenetic conservatism,  
8 which resulted in the high confidence of these predictions (Fig. 4). Within some families,  
9 however, closely related species displayed distinct dietary preferences. The uncertainty around  
10 these family-level predictions was higher, as showcased by high negentropy values for families  
11 such as Balistidae, Diodontidae, and Labridae.

12 Given the high predictive performance of our Bayesian phylogenetic model, we used our  
13 model to extrapolate the probability of all reef fish species belonging to the eight trophic guilds  
14 and assigned the trophic guild with the highest probability. Using leave-one-out cross validation,  
15 the final accuracy of this approach was 65%, which is comparable to other phylogenetically-  
16 extrapolated traits applications, such as those involving microbial traits [52].

17 By inspecting the confusion matrix of the leave-one-out cross validation, we obtained  
18 more detailed information on the accuracy of the trophic guild predictions (Fig. S1). Most  
19 categories were well predicted with our extrapolation approach. In particular, the *sessile*  
20 *invertivores*, *HMD*, and *piscivores* trophic guilds were predicted with high accuracy (77%, 75%,  
21 and 73% correct predictions, respectively). The confusion matrix also provided information on  
22 incorrectly assigned categories. For example, when *piscivores* were incorrectly assigned, they  
23 were mostly classified as *crustacivores*. However, the network plot revealed that the fishes

1 classified as *piscivores* also fed on crustaceans (mostly decapods), so this “incorrect assignment”  
2 was grounded in ecological reality and reflected uncertainty within the model. Additionally, the  
3 *microinvertivores* trophic guild had the highest proportion of inaccurate predictions (52% correct  
4 predictions). Here, species were often misclassified as *crustacivores* or *planktivores*.

## 6 **Discussion**

7       To harness the full strength of trait-based approaches, functional ecology requires  
8 standardized and reproducible trait classification schemes across taxonomic groups [53–55].  
9 Rather than rely on expert opinion for the assignment of trophic groups, which often results in  
10 variable assignments, we demonstrate that the categorization of trophic guilds can be achieved  
11 with a quantitative and reproducible framework that is grounded in empirical data across  
12 biogeographic regions. We employed network analysis to partition 615 tropical coral reef fish  
13 species into eight trophic guilds based on a synthesis of globally distributed, community-wide  
14 fish dietary analyses. We then applied a Bayesian phylogenetic model that predicts trophic guilds  
15 based on phylogeny and body size and attained a 5% misclassification error. Unlike traditional  
16 trophic guilds based on expert opinion [26,27,29,32–37], our trophic classifications are  
17 reproducible, provide uncertainty estimates, and can be updated and improved in the future with  
18 additional dietary information. By making our trophic classification framework publicly  
19 available, we aim to encourage a new, accessible benchmark for the definition of trophic guilds.  
20 Given the growing number of trait-based studies that assign trophic guilds to understand and  
21 monitor ecosystem functioning in our changing world, it is imperative that we establish  
22 comparable and reproducible trophic classification frameworks.

1           Our findings highlight the discordance of expert opinion in the assignment of trophic  
2 guilds and the necessity to develop a quantifiable, reproducible classification scheme that is  
3 accessible to the wider scientific community (c.f. [56]). To address this issue, the framework  
4 proposed herein represents the first implementation of a quantifiable classification scheme for  
5 coral reef fishes, including measures of uncertainty around trophic guild assignments and  
6 providing a new path forward to standardize the definition of traits. Despite broad similarities  
7 between the trophic guilds reported in the literature and the groups identified by our analysis, our  
8 classification scheme reveals a higher level of partitioning among invertebrate-feeding fishes as  
9 compared to previously proposed trophic guilds. In the past, invertebrate-feeding fishes were  
10 generally considered *sessile invertivores*, *mobile invertivores*, or *omnivores* (e.g. [27,28,36]), but  
11 we identify five distinct invertebrate-feeding groups: *corallivores*, *sessile invertivores*,  
12 *microinvertivores*, *macroinvertivores*, and *crustacivores*. Given the extreme numerical  
13 dominance of invertebrates in coral reef environments [57], the collapse of all invertebrate-  
14 feeders into two or three trophic groups was possibly an artefact of expert oversight, and the  
15 expansion of invertebrate-feeding trophic guilds to five groups stands to improve ecological  
16 resolution of fishes feeding on invertebrate prey.

17           In contrast to the high resolution achieved within invertebrate-feeding groups, our  
18 classification achieved limited resolution among the nominally herbivorous species, *herbivores*,  
19 *microvores*, and *detritivores (HMD)*. Across the literature, past classification schemes often  
20 separate macroalgal feeders, turf algae croppers, and detritivores (e.g. [26,27]). The lack of  
21 precision in our framework is rooted in the difficulty in distinguishing algae, microbes, and  
22 detritus within the alimentary tract of fishes, resulting in the pooling of these ingested items  
23 during the visual assessment of fish gut contents. Consequently, species classified as *HMD* may

1 have fundamentally different foraging strategies, dietary preferences, and evolutionary histories  
2 [58], which can greatly impact their functional role on coral reefs (e.g. [59]). Thus, while our  
3 identified trophic guilds promise increased resolution for fishes that consume animal prey, our  
4 identified groupings may not adequately capture consumer-producer dynamics on coral reefs.  
5 Emerging techniques, such as gut content metabarcoding, may provide the additional resolution  
6 needed to further discriminate prey items in this group [60,61]. Alternatively, coupling diet  
7 categorization with other traits, such as feeding behavior, may help to pinpoint the variety of  
8 feeding modes that exist within the *HMD* trophic guild.

9         Our results also highlight the necessity of integrating evolutionary history (i.e.  
10 phylogenetics) in trait-based ecology (c.f. [62]). Recently, taxonomy and body size have been  
11 revealed as important predictors of fish diet composition and size structure [63,64], and in the  
12 highest resolution analyses of coral reef fish diet, taxonomic family was a better predictor of fish  
13 diet than broad trophic guilds [60]. Given the exceedingly low rate of misclassification error in  
14 our predictions of fish trophic guilds, we posit that phylogeny is a critical variable that should be  
15 consistently considered in the assignment of trophic guilds. Across a plethora of organismal  
16 groups (e.g. birds [65], reptiles [66], fishes [67,68], insects [69], parasites [70], plants [71], etc),  
17 phylogenetic niche conservatism has been alternately supported and dismissed. In our case, when  
18 examining fish trophic guilds using 38 prey categories, phylogenetic conservatism is readily  
19 apparent at the family level, and therefore, it may allow us to extrapolate trophic assignments to  
20 closely related consumer species. However, with increasing dietary resolution beyond what is  
21 detailed in the present study, phylogenetic signals may weaken [72] since even closely related  
22 species may exhibit dietary specialization [60,73]. In the future, with the availability of higher



1 resolution of dietary information, phylogenetic niche conservatism can be easily examined  
2 within our framework.

3         With ongoing environmental and ecological change, a firm grasp on shifts in ecosystem  
4 functioning will depend on the reliable assignment of organismal traits [15] and the  
5 comparability of trait-based approaches across space, time, and independent studies [54].  
6 Especially in complex, hyperdiverse environments such as coral reefs, it is imperative to  
7 standardize how we measure and report these traits to prevent idiosyncratic results based on  
8 subjective trait assignments [19,74]. Trophic guilds are among the most commonly applied traits  
9 to assess ecosystem functioning because they directly relate to energy and nutrient fluxes across  
10 trophic levels. Thus, our standardized framework to quantitatively assign trophic guilds across  
11 coral reef fishes represents a major step forward for coral reef functional ecology, while heeding  
12 the call for openly-accessible, reproducible trait databases [22,55,75]. As trait-based ecology  
13 continues to be used to examine disturbances and implement management strategies, our  
14 cohesive and accessible framework to predict reef fish trophic guilds can provide key insights  
15 into the trajectory of coral reef communities. Coupling our trophic guild assignment framework  
16 with predictive models could spur the emergence of an early detection system to forecast shifts  
17 in ecosystem functioning [30].

18         Further, our results can serve as the foundation for an online platform that permits  
19 researchers to collate, update, and utilize trait-based data on coral reef fishes. Similar to current  
20 initiatives across the entire tree of life [55], we envision the creation of an online, user-  
21 maintained dietary database to facilitate collaboration and traceability in trait-based reef fish  
22 research. One challenge will lie in merging visual fish gut content analysis databases with  
23 molecular data, such as gut content DNA metabarcoding (e.g. [60]), and biochemical data, such

1 as stable isotope analysis (e.g. [76]), and short-chain fatty acid profiles (e.g. [77]), which indicate  
2 nutritional assimilation rather than the simple ingestion of prey items [58]. Despite this  
3 challenge, accessibility to a large breadth of reef fish dietary information would improve our  
4 framework. Our proposed trophic guilds are model predictions, so they are only as reliable as the  
5 underlying dietary data. In addition, these predictions may suffer from extrapolation biases; for  
6 example, if limited dietary information exists across species within a taxonomic group,  
7 extrapolations to closely related species are more likely to be assigned erroneous trophic guilds.  
8 Consequently, an ongoing, extensive compilation of dietary traits across coral reef fishes will  
9 continuously improve our predicted trophic guild assignments.

10 Finally, our proposed framework is not limited to coral reef fishes; indeed, trophic guild  
11 assignments can be quantifiable, reproducible, and transparent, with the inclusion of uncertainty  
12 metrics, across many organismal groups. However, the standardization of trophic guilds is sorely  
13 lacking across the ecological literature [56], especially based on quantitative data (e.g. [78]). We  
14 posit that a similar approach can be readily applied across a multitude of organisms and  
15 environments. In fact, given the paucity of dietary information available for coral reef fishes in  
16 comparison to other organisms, particularly birds and mammals, building rigorous, global  
17 trophic classification schemes for many other organisms should be readily achievable within our  
18 framework. With a quantitative, transparent trophic classification scheme that can be augmented  
19 over time and is applicable across ecological systems, our framework represents a significant  
20 advancement for trait-based ecology and a viable approach to monitor ecosystem dynamics into  
21 the future [55].

22

## 1 **Acknowledgements**

2 This work was supported by the Centre de Recherche Insulaires et Observatoire de  
3 l'Environnement (CRIOBE) in Perpignan, France. We thank all the researchers who have made  
4 their fish gut content data and/or trait-based fish trophic guild assignments publicly available for  
5 use by the wider scientific community. All the relevant data used to perform the analyses and the  
6 results of our extrapolation will be made available once the manuscript is published in a  
7 scientific journal.

## 8 9 **Author Contributions**

10 **Conceptualization:** Valeriano Parravicini, Jordan M. Casey, Nina M. D. Schiettekatte

11 **Data curation:** Valeriano Parravicini, Jordan M. Casey, Chloé Pozas-Schacre

12 **Formal analysis:** Valeriano Parravicini, Nina M. D. Schiettekatte

13 **Funding acquisition:** Valeriano Parravicini

14 **Investigation:** Valeriano Parravicini, Jordan M. Casey, Nina M. D. Schiettekatte, Simon Brandl,

15 Chloé Pozas-Schacre, Jérémy Carlot, Graham J. Edgar, Nicholas A. J. Graham, Mireille

16 Harmelin-Vivien, Michel Kulbicki, Giovanni Strona, Rick D. Stuart-Smith, Jason Vii

17 **Methodology:** Valeriano Parravicini, Jordan M. Casey, Nina M. D. Schiettekatte, Simon J.

18 Brandl, Chloé Pozas-Schacre

19 **Supervision:** Valeriano Parravicini, Jordan M. Casey

20 **Visualization:** Valeriano Parravicini, Jordan M. Casey, Nina M. D. Schiettekatte, Simon J.

21 Brandl

22 **Writing - original draft:** Valeriano Parravicini, Jordan M. Casey

1 **Writing - review & editing:** Valeriano Parravicini, Jordan M. Casey, Nina M. D. Schiettekatte,  
2 Simon J. Brandl, Chloé Pozas-Schacre, Jérémy Carlot, Graham J. Edgar, Nicholas A. J. Graham,  
3 Mireille Harmelin-Vivien, Michel Kulbicki, Giovanni Strona, Rick D. Stuart-Smith, and Jason  
4 Vii

## 6 **Funding**

7 This research was funded by the BNP Paribas Foundation (Reef Services Project) and the French  
8 National Agency for Scientific Research (ANR; REEFLEX Project; ANR-17-CE32-0006). This  
9 research is product of the SCORE-REEF group funded by the Centre de Synthèse et d'Analyse  
10 sur la Biodiversité (CESAB) of the Foundation pour la Recherche sur la Biodiversité (FRB) and  
11 the Agence Nationale de la Biodiversité (AFB). VP was supported by the Institut Universitaire  
12 de France (IUF), JMC was supported by a Make Our Planet Great Again Postdoctoral Grant  
13 (mopga-pdf-0000000144), and JC was supported by the French Polynesian Government  
14 (RisqueRecif project).

## 16 **References**

- 17 1. Tilman D, Isbell F, Cowles JM. Biodiversity and Ecosystem Functioning. *Annual Review*  
18 *of Ecology, Evolution, and Systematics*. 2014;45: 471–493. doi:10.1146/annurev-ecolsys-  
19 120213-091917
- 20 2. Reiss J, Bridle JR, Montoya JM, Woodward G. Emerging horizons in biodiversity and  
21 ecosystem functioning research. *Trends in Ecology & Evolution*. 2009;24: 505–514.  
22 doi:10.1016/j.tree.2009.03.018
- 23 3. Whittaker RH, Levin SA, Root RB. Niche, Habitat, and Ecotope. *The American Naturalist*.  
24 1973;107: 321–338.
- 25 4. Finke DL, Snyder WE. Niche partitioning increases resource exploitation by diverse  
26 communities. *Science*. 2008;321: 1488–1490. doi:10.1126/science.1160854

- 1 5. Levine JM, HilleRisLambers J. The importance of niches for the maintenance of species  
2 diversity. *Nature*. 2009;461: 254–257. doi:10.1038/nature08251
- 3 6. Poisot T, Mouquet N, Gravel D. Trophic complementarity drives the biodiversity-  
4 ecosystem functioning relationship in food webs. *Ecology Letters*. 2013;16: 853–861.  
5 doi:10.1111/ele.12118
- 6 7. Loreau M, Naeem S, Inchausti P, Bengtsson J, Grime JP, Hector A, et al. Biodiversity and  
7 Ecosystem Functioning: Current Knowledge and Future Challenges. *Science*. 2001;294:  
8 804. doi:10.1126/science.1064088
- 9 8. Terborgh JW. Toward a trophic theory of species diversity. *Proc Natl Acad Sci USA*.  
10 2015;112: 11415. doi:10.1073/pnas.1501070112
- 11 9. Mouillot D, Bellwood DR, Baraloto C, Chave J, Galzin R, Harmelin-Vivien M, et al. Rare  
12 Species Support Vulnerable Functions in High-Diversity Ecosystems. Mace GM, editor.  
13 *PLoS Biology*. 2013;11: e1001569. doi:10.1371/journal.pbio.1001569
- 14 10. Rosenfeld JS. Functional redundancy in ecology and conservation. *Oikos*. 2002;98: 156–  
15 162. doi:10.1034/j.1600-0706.2002.980116.x
- 16 11. Wohl DL, Arora S, Gladstone JR. Functional redundancy supports biodiversity and  
17 ecosystem function in a closed and constant environment. *Ecology*. 2004;85: 1534–1540.  
18 doi:10.1890/03-3050
- 19 12. Brandl SJ, Bellwood DR. Individual-based analyses reveal limited functional overlap in a  
20 coral reef fish community. Hays G, editor. *Journal of Animal Ecology*. 2014;83: 661–670.  
21 doi:10.1111/1365-2656.12171
- 22 13. Wilman H, Belmaker J, Simpson J, de la Rosa C, Rivadeneira MM, Jetz W. EltonTraits 1.0:  
23 Species-level foraging attributes of the world’s birds and mammals. *Ecology*. 2014;95:  
24 2027–2027. doi:10.1890/13-1917.1
- 25 14. Kraft NJB, Valencia R, Ackerly DD. Functional traits and niche-based tree community  
26 assembly in an Amazonian forest. *Science*. 2008;322: 580. doi:10.1126/science.1160662
- 27 15. McGill B, Enquist B, Weiher E, Westoby M. Rebuilding community ecology from  
28 functional traits. *Trends in Ecology & Evolution*. 2006;21: 178–185.  
29 doi:10.1016/j.tree.2006.02.002
- 30 16. De Deyn GB, Cornelissen JHC, Bardgett RD. Plant functional traits and soil carbon  
31 sequestration in contrasting biomes. *Ecology Letters*. 2008;11: 516–531.  
32 doi:10.1111/j.1461-0248.2008.01164.x
- 33 17. Schmera D, Podani J, Heino J, Erős T, Poff NL. A proposed unified terminology of species  
34 traits in stream ecology. *Freshwater Science*. 2015;34: 823–830. doi:10.1086/681623

- 1 18. Belmaker J, Parravicini V, Kulbicki M. Ecological traits and environmental affinity explain  
2 Red Sea fish introduction into the Mediterranean. *Global Change Biology*. 2013;19: 1373–  
3 1382. doi:10.1111/gcb.12132
- 4 19. Brandl SJ, Rasher DB, Côté IM, Casey JM, Darling ES, Lefcheck JS, et al. Coral reef  
5 ecosystem functioning: eight core processes and the role of biodiversity. *Frontiers in*  
6 *Ecology and the Environment*. 2019;17: 445–454. doi:10.1002/fee.2088
- 7 20. Nash KL, Watson RA, Halpern BS, Fulton EA, Blanchard JL. Improving understanding of  
8 the functional diversity of fisheries by exploring the influence of global catch  
9 reconstruction. *Scientific Reports*. 2017;7: 10746. doi:10.1038/s41598-017-10723-1
- 10 21. Aubin I, Venier L, Pearce J, Moretti M. Can a trait-based multi-taxa approach improve our  
11 assessment of forest management impact on biodiversity? *Biodiversity and Conservation*.  
12 2013;22: 2957–2975. doi:10.1007/s10531-013-0565-6
- 13 22. Madin JS, Anderson KD, Andreasen MH, Bridge TCL, Cairns SD, Connolly SR, et al. The  
14 Coral Trait Database, a curated database of trait information for coral species from the  
15 global oceans. *Scientific Data*. 2016;3: 160017. doi:10.1038/sdata.2016.17
- 16 23. Stuart-Smith RD, Bates AE, Lefcheck JS, Duffy JE, Baker SC, Thomson RJ, et al.  
17 Integrating abundance and functional traits reveals new global hotspots of fish diversity.  
18 *Nature*. 2013;501: 539–542. doi:10.1038/nature12529
- 19 24. McClanahan TR. A coral reef ecosystem-fisheries model: impacts of fishing intensity and  
20 catch selection on reef structure and processes. *Ecological Modelling*. 1995;80: 1–19.  
21 doi:10.1016/0304-3800(94)00042-G
- 22 25. Ferreira CEL, Floeter SR, Gasparini JL, Ferreira BP, Joyeux JC. Trophic structure patterns  
23 of Brazilian reef fishes: a latitudinal comparison. *Journal of Biogeography*. 2004;31: 1093–  
24 1106. doi:10.1111/j.1365-2699.2004.01044.x
- 25 26. Mouillot D, Villeger S, Parravicini V, Kulbicki M, Arias-Gonzalez JE, Bender M, et al.  
26 Functional over-redundancy and high functional vulnerability in global fish faunas on  
27 tropical reefs. *Proceedings of the National Academy of Sciences*. 2014;111: 13757–13762.  
28 doi:10.1073/pnas.1317625111
- 29 27. Parravicini V, Villéger S, McClanahan TR, Arias-González JE, Bellwood DR, Belmaker J,  
30 et al. Global mismatch between species richness and vulnerability of reef fish assemblages.  
31 Byers JJ, editor. *Ecology Letters*. 2014;17: 1101–1110. doi:10.1111/ele.12316
- 32 28. Micheli F, Mumby PJ, Brumbaugh DR, Broad K, Dahlgren CP, Harborne AR, et al. High  
33 vulnerability of ecosystem function and services to diversity loss in Caribbean coral reefs.  
34 *Biological Conservation*. 2014;171: 186–194. doi:10.1016/j.biocon.2013.12.029
- 35 29. Stuart-Smith RD, Brown CJ, Ceccarelli DM, Edgar GJ. Ecosystem restructuring along the  
36 Great Barrier Reef following mass coral bleaching. *Nature*. 2018;560: 92–96.  
37 doi:10.1038/s41586-018-0359-9

- 1 30. Mouillot D, Graham NAJ, Villéger S, Mason NWH, Bellwood DR. A functional approach  
2 reveals community responses to disturbances. *Trends in Ecology & Evolution*. 2013;28:  
3 167–177. doi:10.1016/j.tree.2012.10.004
- 4 31. Mason NWH, de Bello F. Functional diversity: a tool for answering challenging ecological  
5 questions. *Journal of Vegetation Science*. 2013;24: 777–780. doi:10.1111/jvs.12097
- 6 32. Brandl SJ, Emslie MJ, Ceccarelli DM, T. Richards Z. Habitat degradation increases  
7 functional originality in highly diverse coral reef fish assemblages. *Ecosphere*. 2016;7.  
8 doi:10.1002/ecs2.1557
- 9 33. Halpern BS, Floeter SR. Functional diversity responses to changing species richness in reef  
10 fish communities. *Mar Ecol Prog Ser*. 2008;364: 147–156.
- 11 34. Graham NAJ, Chabanet P, Evans RD, Jennings S, Letourneur Y, Aaron MacNeil M, et al.  
12 Extinction vulnerability of coral reef fishes: Reef fish extinction vulnerability. *Ecology*  
13 *Letters*. 2011;14: 341–348. doi:10.1111/j.1461-0248.2011.01592.x
- 14 35. Morais RA, Bellwood DR. Global drivers of reef fish growth. *Fish and Fisheries*. 2018;19:  
15 874–889. doi:10.1111/faf.12297
- 16 36. Yeager LA, Deith MCM, McPherson JM, Williams ID, Baum JK. Scale dependence of  
17 environmental controls on the functional diversity of coral reef fish communities. *Global*  
18 *Ecology and Biogeography*. 2017;26: 1177–1189. doi:10.1111/geb.12628
- 19 37. Newman MJH, Paredes GA, Sala E, Jackson JBC. Structure of Caribbean coral reef  
20 communities across a large gradient of fish biomass. *Ecology Letters*. 2006;9: 1216–1227.  
21 doi:10.1111/j.1461-0248.2006.00976.x
- 22 38. Hiatt RW, Strasburg DW. Ecological relationships of the fish fauna on coral reefs of the  
23 Marshall Islands. *Ecological Monographs*. 1960;30: 65–127. doi:10.2307/1942181
- 24 39. Randall JE. Food habits of reef fishes of the West Indies. *Hawaii Institute of Marine*  
25 *Biology*. 1967; 1–94.
- 26 40. Hobson ES. Feeding relationships of teleostean fishes on coral reefs in Kona, Hawaii.  
27 *Fishery Bulletin*. 1974;72: 915–1031.
- 28 41. Harmelin-Vivien M. Ichtyofaune des récifs coralliens de Tulear (Madagascar): ecologie et  
29 relations trophiques. L'Université d'Aix-Marseille II. 1979.
- 30 42. Sano M, Shimizu M, Nose Y. Food habits of teleostean reef fishes in Okinawa Island,  
31 southern Japan. The University of Tokyo; 1984.
- 32 43. Boettiger C, Lang DT, Wainwright PC. rfishbase: exploring, manipulating and visualizing  
33 FishBase data from R. *Journal of Fish Biology*. 2012;81: 2030–2039. doi:10.1111/j.1095-  
34 8649.2012.03464.x

- 1 44. Beckett SJ. Improved community detection in weighted bipartite networks. *Royal Society*  
2 *Open Science*. 2016;3: 140536. doi:10.1098/rsos.140536
- 3 45. Serafini P. Simulated Annealing for Multi Objective Optimization Problems. In: Tzeng G,  
4 Wang H, Wen U, Yu P, editors. *Multiple Criteria Decision Making*. New York: Springer;  
5 1994. pp. 283–292.
- 6 46. Meilă M. Comparing clusterings—an information based distance. *Journal of Multivariate*  
7 *Analysis*. 2007;98: 873–895. doi:10.1016/j.jmva.2006.11.013
- 8 47. Rabosky DL, Chang J, Title PO, Cowman PF, Sallan L, Friedman M, et al. An inverse  
9 latitudinal gradient in speciation rate for marine fishes. *Nature*. 2018;559: 392–395.  
10 doi:10.1038/s41586-018-0273-1
- 11 48. Chang J, Rabosky DL, Smith SA, Alfaro ME. An R package and online resource for  
12 macroevolutionary studies using the ray-finned fish tree of life. *Methods in Ecology and*  
13 *Evolution*. 2019. doi:10.1111/2041-210X.13182
- 14 49. Yu G, Smith DK, Zhu H, Guan Y, Lam TT-Y. ggtree: an R package for visualization and  
15 annotation of phylogenetic trees with their covariates and other associated data. *Methods in*  
16 *Ecology and Evolution*. 2017;8: 28–36. doi:10.1111/2041-210X.12628
- 17 50. Bürkner P-C. brms: An R Package for Bayesian Multilevel Models Using Stan. *Journal of*  
18 *Statistical Software*; Vol 1, Issue 1 (2017). 2017. Available:  
19 <https://www.jstatsoft.org/v080/i01>
- 20 51. Kembel SW, Cowan PD, Helmus MR, Cornwell WK, Morlon H, Ackerly DD, et al.  
21 *Picante: R tools for integrating phylogenies and ecology*. *Bioinformatics*. 2010;26: 1463–  
22 1464. doi:10.1093/bioinformatics/btq166
- 23 52. Goberna M, Verdú M. Predicting microbial traits with phylogenies. *The ISME Journal*.  
24 2016;10: 959–967. doi:10.1038/ismej.2015.171
- 25 53. Schneider FD, Fichtmueller D, Gossner MM, Güntsch A, Jochum M, König-Ries B, et al.  
26 *Towards an ecological trait-data standard*. *Methods in Ecology and Evolution*. 2019;10:  
27 2006–2019. doi:10.1111/2041-210X.13288
- 28 54. Weiss KCB, Ray CA. Unifying functional trait approaches to understand the assemblage of  
29 ecological communities: synthesizing taxonomic divides. *Ecography*. 2019;42: 2012–2020.  
30 doi:10.1111/ecog.04387
- 31 55. Gallagher R, Falster DS, Maitner B, Salguero-Gomez R, Vandvik V, Pearse W, et al. The  
32 *Open Traits Network: Using Open Science principles to accelerate trait-based science*  
33 *across the Tree of Life*. doi:10.32942/osf.io/kac45
- 34 56. Cano-Barbacil C, Radinger J, García-Berthou E. Reliability analysis of fish traits reveals  
35 discrepancies among databases. *Freshwater Biology*. 2020 [cited 12 Feb 2020].  
36 doi:10.1111/fwb.13469



- 1 57. Glynn PW, Enochs IC. Invertebrates and Their Roles in Coral Reef Ecosystems. In:  
2 Dubinsky Z, Stambler N, editors. *Coral Reefs: An Ecosystem in Transition*. Dordrecht:  
3 Springer Netherlands; 2011. pp. 273–325.
- 4 58. Clements KD, German DP, Piché J, Tribollet A, Choat JH. Integrating ecological roles and  
5 trophic diversification on coral reefs: multiple lines of evidence identify parrotfishes as  
6 microphages. *Biological Journal of the Linnean Society*. 2016. doi:10.1111/bij.12914
- 7 59. Brandl SJ, Bellwood DR. Microtopographic refuges shape consumer-producer dynamics by  
8 mediating consumer functional diversity. *Oecologia*. 2016;182: 203–217.  
9 doi:10.1007/s00442-016-3643-0
- 10 60. Casey JM, Meyer CP, Morat F, Brandl SJ, Planes S, Parravicini V. Reconstructing  
11 hyperdiverse food webs: Gut content metabarcoding as a tool to disentangle trophic  
12 interactions on coral reefs. Mahon A, editor. *Methods in Ecology and Evolution*. 2019;10:  
13 1157–1170. doi:10.1111/2041-210X.13206
- 14 61. Brandl SJ, Casey JM, Meyer CP. Dietary and habitat niche partitioning in congeneric  
15 cryptobenthic reef fish species. *Coral Reefs*. 2020 [cited 28 Jan 2020]. doi:10.1007/s00338-  
16 020-01892-z
- 17 62. Westoby M. Phylogenetic ecology at world scale, a new fusion between ecology and  
18 evolution. *Ecology*. 2006;87: S163–S165.
- 19 63. Soler G, Thomson R, Stuart-Smith R, Smith A, Edgar G. Contributions of body size, habitat  
20 and taxonomy to predictions of temperate Australian fish diets. *Marine Ecology Progress*  
21 *Series*. 2016;545: 239–249. doi:10.3354/meps11584
- 22 64. Soler GA, Edgar GJ, Stuart-Smith RD, Smith ADM, Thomson RJ. Predicting the diet of  
23 coastal fishes at a continental scale based on taxonomy and body size. *Journal of*  
24 *Experimental Marine Biology and Ecology*. 2016;480: 1–7.  
25 doi:10.1016/j.jembe.2016.03.017
- 26 65. Lovette IJ, Hochachka WM. Simultaneous effects of phylogenetic niche conservatism and  
27 competition on avian community structure. *Ecology*. 2006;87: S14–S28.
- 28 66. Knouft JH, Losos JB, Glor RE, Kolbe JJ. Phylogenetic analysis of the evolution of the  
29 niche in lizards of the *Anolis sagrei* group. *Ecology*. 2006;87: S29–S38.
- 30 67. Peres-Neto PR. Patterns in the co-occurrence of fish species in streams: the role of site  
31 suitability, morphology and phylogeny versus species interactions. *Oecologia*. 2004;140:  
32 352–360. doi:10.1007/s00442-004-1578-3
- 33 68. Gajdzik L, Aguilar-Medrano R, Frédérick B. Diversification and functional evolution of  
34 reef fish feeding guilds. *Ecology Letters*. 2019. doi:10.1111/ele.13219
- 35 69. Weiblen GD, Webb CO, Novotny V, Basset Y, Miller SE. Phylogenetic dispersion of host  
36 use in a tropical insect herbivore community. *Ecology*. 2006;87: S62–S75.

- 1 70. Mouillot D, R. Krasnov B, I. Shenbrot G, J. Gaston K, Poulin R. Conservatism of host  
2 specificity in parasites. *Ecography*. 2006;29: 596–602. doi:10.1111/j.0906-  
3 7590.2006.04507.x
- 4 71. Silvertown J, Dodd M, Gowing D, Lawson C, McConway K. Phylogeny and the  
5 hierarchical organization of plant diversity. *Ecology*. 2006;87: S39–S49.
- 6 72. Mazel F, Pennell MW, Cadotte MW, Diaz S, Dalla Riva GV, Grenyer R, et al. Prioritizing  
7 phylogenetic diversity captures functional diversity unreliably. *Nature Communications*.  
8 2018;9. doi:10.1038/s41467-018-05126-3
- 9 73. Leray M, Alldredge AL, Yang JY, Meyer CP, Holbrook SJ, Schmitt RJ, et al. Dietary  
10 partitioning promotes the coexistence of planktivorous species on coral reefs. *Molecular*  
11 *Ecology*. 2019;28: 2694–2710. doi:10.1111/mec.15090
- 12 74. Bellwood DR, Streit RP, Brandl SJ, Tebbett SB. The meaning of the term ‘function’ in  
13 ecology: A coral reef perspective. *Functional Ecology*. 2019;33: 948–961.  
14 doi:10.1111/1365-2435.13265
- 15 75. Jeliaskov A, Mijatovic D, Chantepie S, Andrew N, Arlettaz R, Barbaro L, et al. A global  
16 database for metacommunity ecology, integrating species, traits, environment and space.  
17 *Scientific Data*. 2020;7. doi:10.1038/s41597-019-0344-7
- 18 76. Eurich J, McCormick M, Jones G. Habitat selection and aggression as determinants of fine-  
19 scale partitioning of coral reef zones in a guild of territorial damselfishes. *Marine Ecology*  
20 *Progress Series*. 2018;587: 201–215. doi:10.3354/meps12458
- 21 77. Choat HJ, Clements KD, Robbins WD. The trophic status of herbivorous fishes on coral  
22 reefs: I. Dietary analyses. *Marine Biology*. 2002;140: 613–623. doi:10.1007/s00227-001-  
23 0715-3
- 24 78. González-Salazar C, Martínez-Meyer E, López-Santiago G. A hierarchical classification of  
25 trophic guilds for North American birds and mammals. *Revista Mexicana de Biodiversidad*.  
26 2014;85: 931–941. doi:10.7550/rmb.38023

27

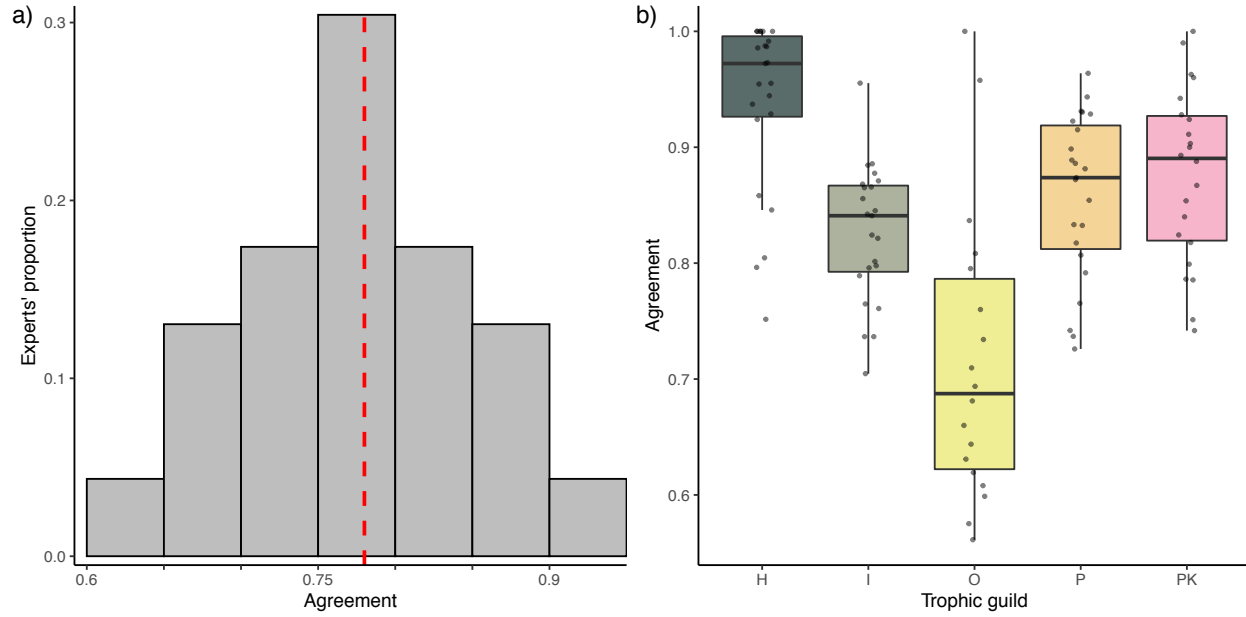

1  
2 **Figure 1.** Expert agreement on trophic guild assignment. (a) The distribution of the agreement  
3 (i.e. proportion of species assigned to the same trophic category) across the 32 comparisons  
4 between pairs of experts. The red dotted line represents the median. (b) Agreement between pairs  
5 of experts by trophic category (H=herbivores and detritivores, I=invertivores, O=omnivores,  
6 P=piscivores, PK=planktivores).

7

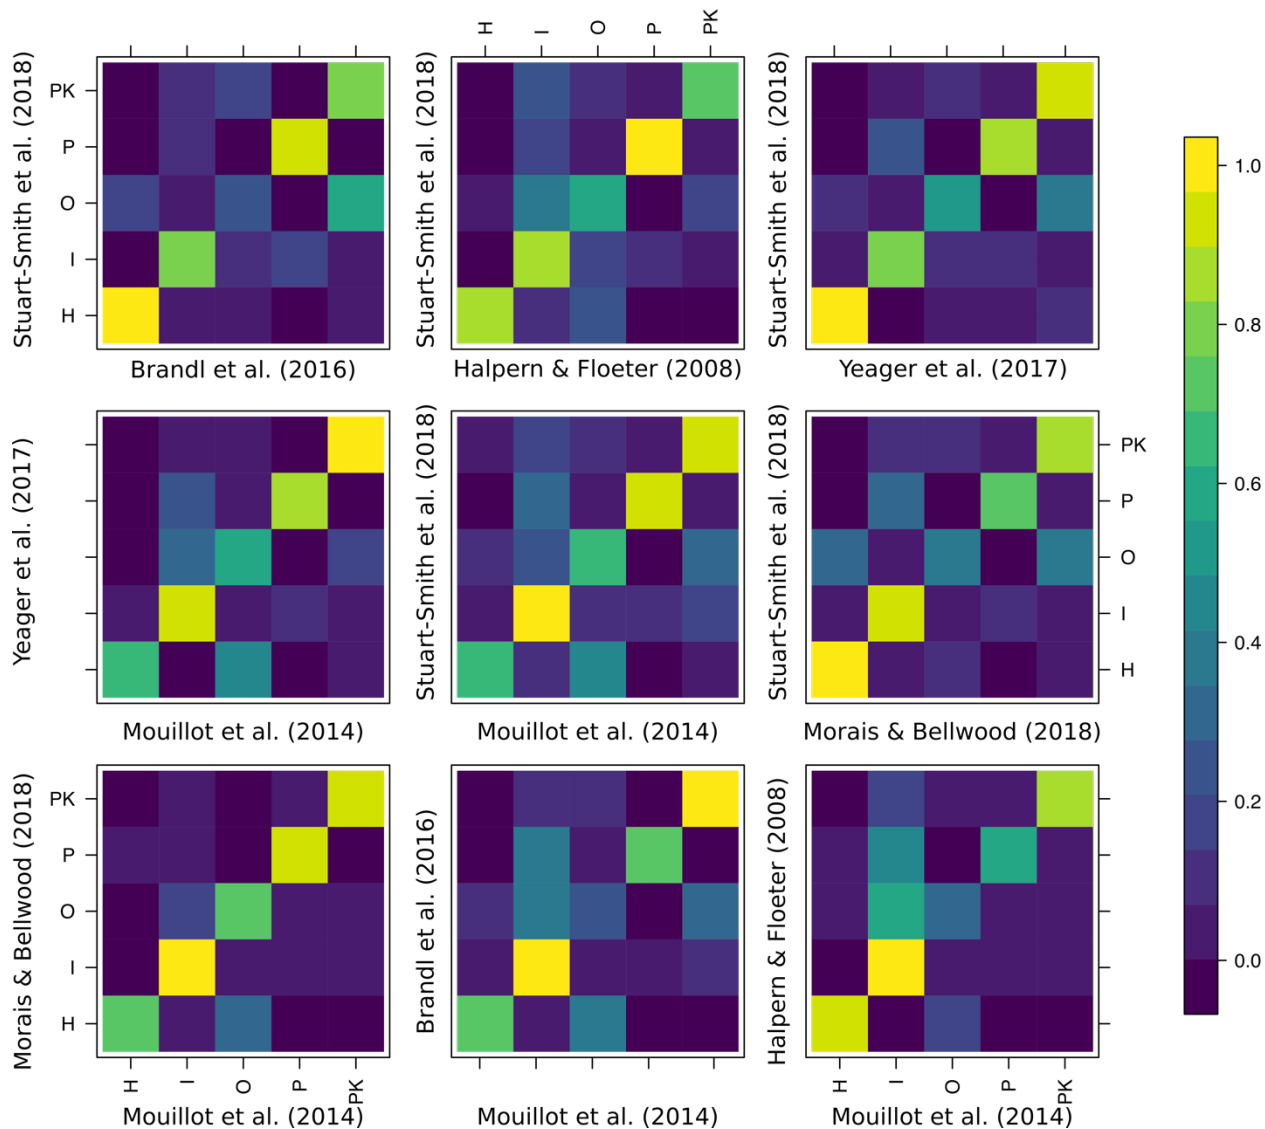

1  
2  
3  
4  
5  
6  
7  
8  
9

**Figure 2.** Confusion matrices of the agreement between pairs of experts that share at least 200 species in common. Colors represent proportions of species in each trophic guild as classified by experts (H=herbivores and detritivores, I=invertivores, O=omnivores, P=piscivores, PK=planktivores).

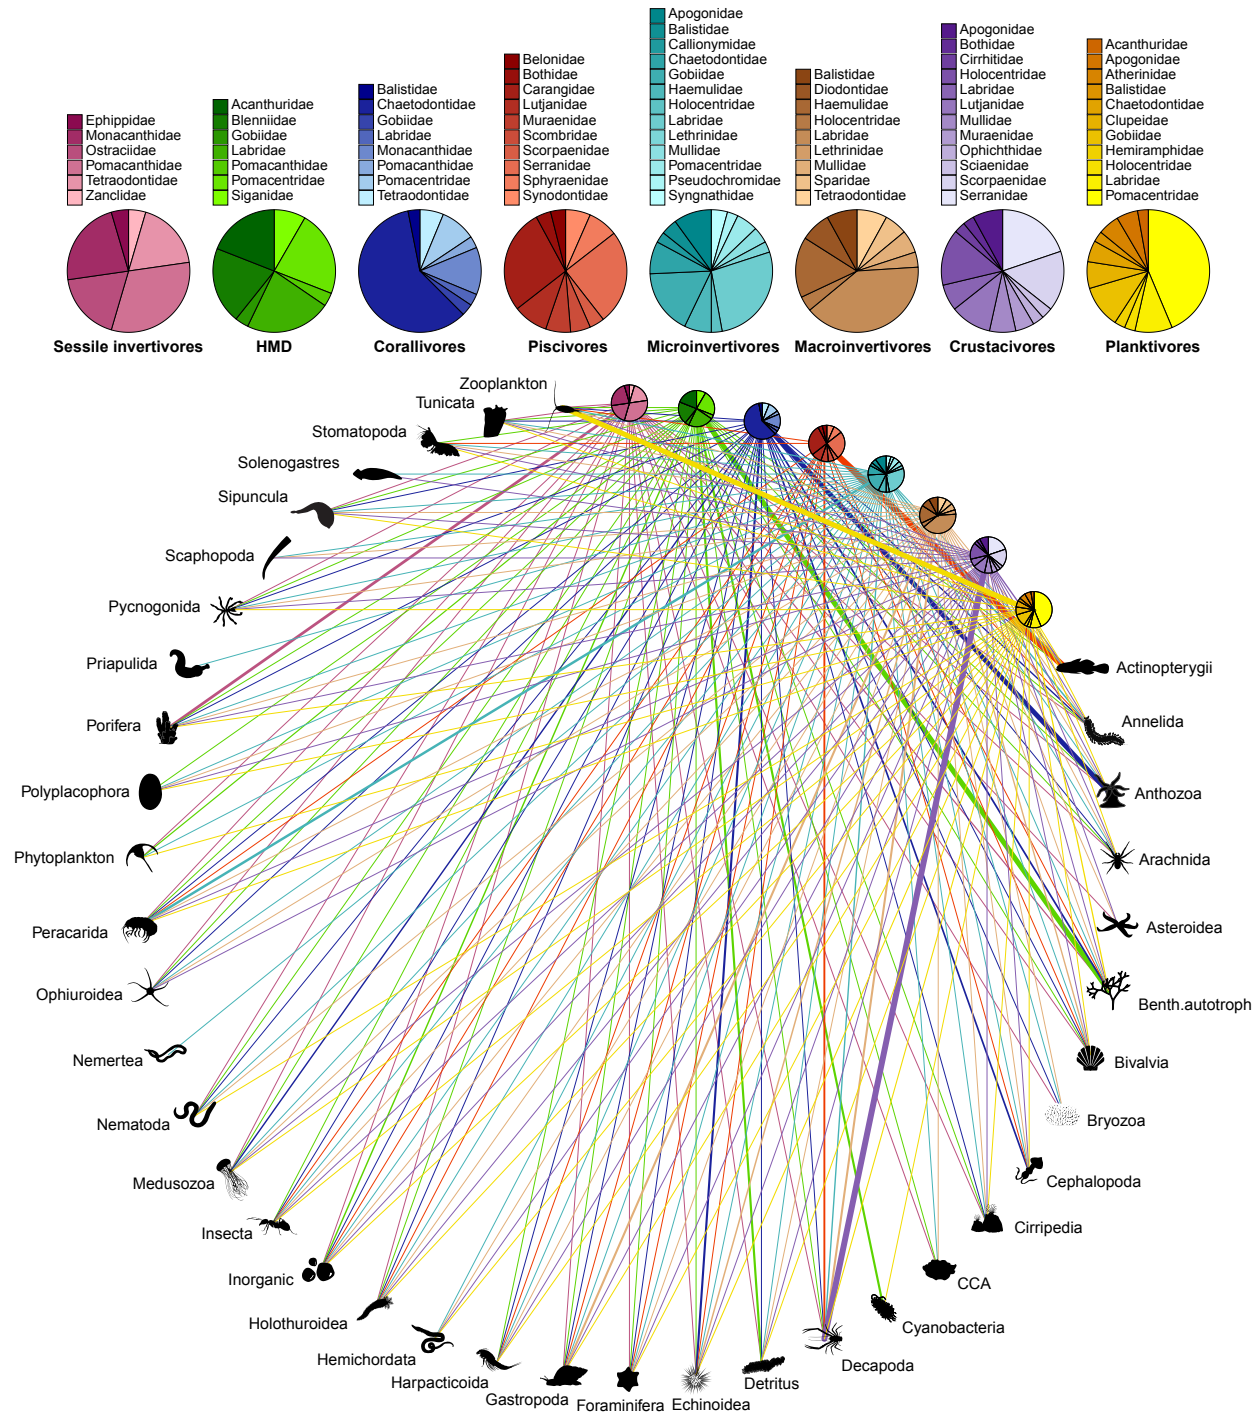

1

2

3 **Figure 3.** Bipartite network including 615 fish species (grouped into eight trophic guilds; HMD

4 = *herbivores, microvores, and detritivores*) and their prey items (grouped into 38 categories; see

5 Table S1). The relative proportion of each prey category consumed by each trophic guild

- 1 corresponds with the width of each interaction bar. The pie charts show the relative proportion of
- 2 fish families within each trophic guild.

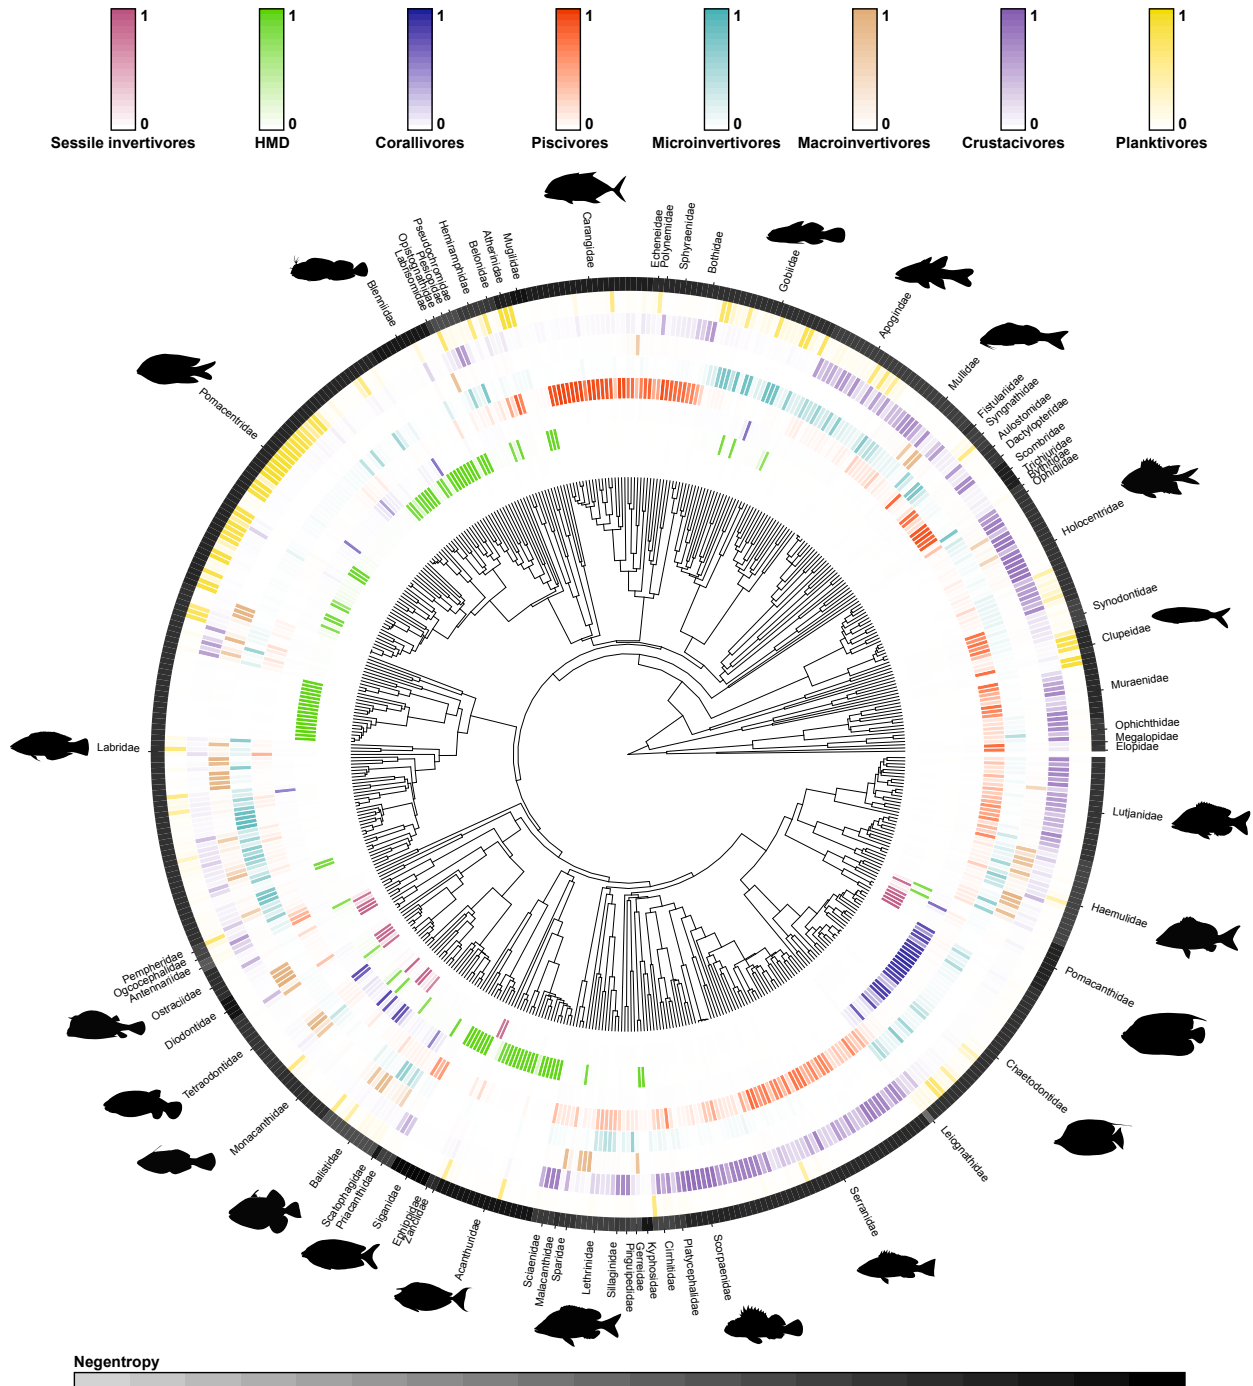

**Figure 4.** Phylogenetic tree of 535 reef fish species with fitted trophic guild assignments based on empirical dietary data. Trophic guild predictions were made with a Bayesian multinomial phylogenetic regression. The probability of trophic guild assignments for each species is visualized with color scales (depicted above the phylogenetic tree), with darker colors indicating

1 a higher probability of assignment. In the outer black ring, each distinct segment represents a fish  
2 family (with silhouettes included for the most speciose families). Uncertainty of overarching  
3 trophic guild assignment for each fish family is visualized with negentropy values (i.e. reverse  
4 entropy); thus, darker shades indicate a higher degree of certainty of trophic guild assignment.  
5



1 **Supporting Information**

2

3

4 **Table S1.** List of prey categories used to define the trophic preferences of coral reef fishes.

5

| <b>Prey categories</b> |
|------------------------|
| Actinopterygii         |
| Annelida               |
| Anthozoa               |
| Arachnida              |
| Asteroidea             |
| Benthic autotroph      |
| Bivalvia               |
| Bryozoa                |
| Cephalopoda            |
| Cirripedia             |
| Coralline algae        |
| Cyanobacteria          |
| Decapoda               |
| Detritus               |
| Echinoidea             |
| Foraminifera           |
| Gastropoda             |
| Harpacticoida          |
| Hemichordata           |
| Holothuroidea          |
| Inorganic              |
| Insecta                |
| Medusozoa              |
| Nematoda               |
| Nemertea               |
| Ophiuroidea            |
| Peracarida             |
| Phytoplankton          |
| Polyplacophora         |
| Porifera               |
| Priapulida             |
| Pycnogonida            |
| Scaphopoda             |
| Sipuncula              |
| Solenogastres          |
| Stomatopoda            |
| Tunicata               |
| Zooplankton            |

6

7

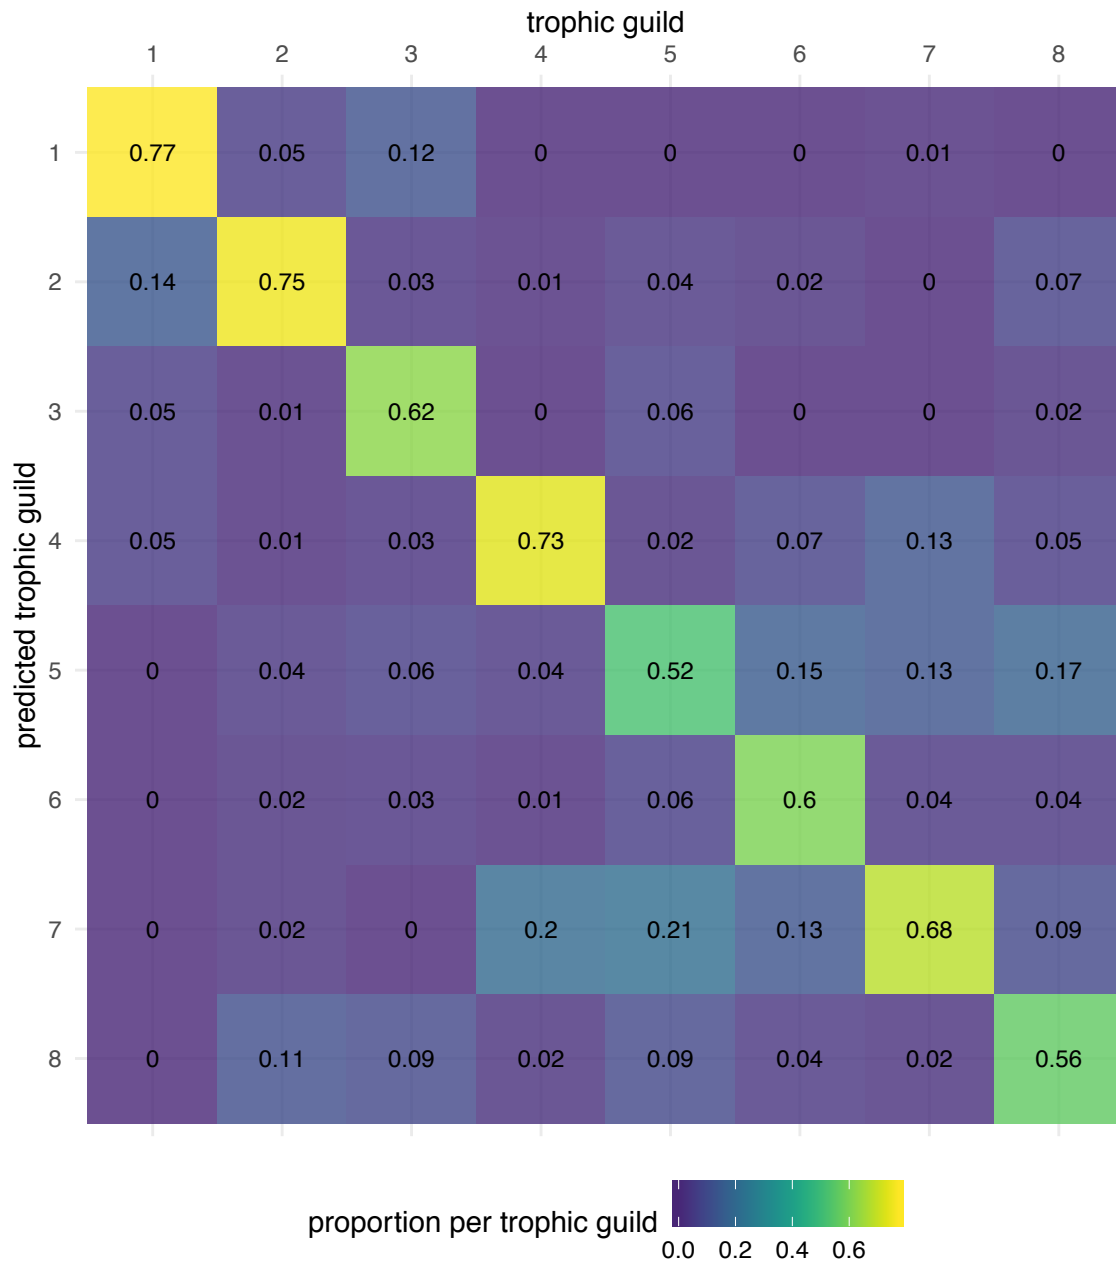

1

2 **Figure S1.** Confusion matrix showcasing the accuracy of the eight trophic guild predictions from  
3 the leave-one-out cross validation based on the extrapolation of the Bayesian phylogenetic  
4 model. Trophic guilds include: (1) *sessile invertivores*, (2) *herbivores, microvores, and*  
5 *detritivores*, (3) *corallivores*, (4) *piscivores*, (5) *microinvertivores*, (6) *macroinvertivores*, (7)  
6 *crustacivores*, and (8) *planktivores*.
